# Supplementary material
Source: publisher figshare collection journal article supplement (https://diabetesjournals.figshare.com/ndownloader/files/31537823)
Supplement: Supplementary file 1 [file 31537823]

Supplementary Table S1

**Multiple Regression: Qualitative Coping Codes Predict Quantitative Indices (Standardized Beta Coefficients)**

|  | Observed CC | Emotional support | Instrumental support | Overprotective behavior | |
| --- | --- | --- | --- | --- | --- |
| PATIENT QUALITATIVE |  |  |  | |  | |
| Partner provides support | .04 | .15* | .13+ | | .05 | |
| Patient/partner collaboration | .36*** | .30*** | .26*** | | .05 | |
| Partner controlling | -.03 | .07 | .12+ | | .23** | |
| Patient independent coping | -.02 | -.02 | -.08 | | -.09 | |
| Patient diabetes disengagement | -.02 | -.11 | -.00 | | -.01 | |
|  |  |  |  | |  | |
| PARTNER QUALITATIVE |  |  |  | |  | |
| Partner provides support | -.01 | .29*** | .19** | | .22*** | |
| Patient/partner collaboration | .38*** | .24*** | .19** | | -.10 | |
| Partner controlling | .08 | .07 | .15* | | .14* | |
| Patient independent coping | -.17* | -.08 | -.21*** | | -.34*** | |
| Patient diabetes disengagement | .01 | -.08 | .02 | | .10 | |

Note: CC = communal coping; +*p* < .10; **p* < .05; ***p* < .01; ****p* < .001
